# Supplementary material
Source: PubMed Central journal article supplement (PMC2939187)
Supplement: NIHMS232596-supplement-1_si_001.pdf [file NIHMS232596-supplement-1_si_001.pdf]

## Supplementary Data

Matrix-free LDI mass spectrometry platform using patterned nanostructured gold thin film

Ranu Nayak and Daniel R Knapp\*

MUSC Proteomics Center, Medical University of South Carolina, Charleston, SC 29425

The following tables list the identified peaks for the spectra shown in Figure 6. Peaks listed were observed with S/N of 5 or greater.

## Peptide fragments observed using MALDI MS for BSA digest

| m/z submitted | MH+ matched | Delta Da | Start | End | Missed clvg | Sequence                                                                    |
|---------------|-------------|----------|-------|-----|-------------|-----------------------------------------------------------------------------|
| 656.05        | 656.35      | -0.29    | 24    | 28  | 1           | (R)RDTHK(S)                                                                 |
| 927.55        | 927.49      | 0.05     | 161   | 167 | 0           | (K)YLYEIAR(R)                                                               |
| 1163.69       | 1163.63     | 0.06     | 66    | 75  | 0           | (K)LVNELTEFAK(T)                                                            |
| 1419.59       | 1419.69     | -0.10    | 89    | 100 | 0           | (K)SLHTLFGDEL(C(Carbamidomethyl)K(V)                                        |
| 1439.70       | 1439.81     | -0.11    | 360   | 371 | 1           | (R)RHPEYAVSVLLR(L)                                                          |
| 1443.59       | 1443.64     | -0.05    | 286   | 297 | 0           | (K)YIC(Carbamidomethyl)DNQDTISSK(L)                                         |
| 1463.58       | 1463.59     | -0.01    | 76    | 88  | 0           | (K)TC(Carbamidomethyl)VADESHAGC(Carbamidomethyl)EK(S)                       |
| 1479.65       | 1479.80     | -0.14    | 421   | 433 | 0           | (K)LGEYGFQNALIVR(Y)                                                         |
| 1502.62       | 1502.61     | 0.00     | 375   | 386 | 0           | (K)EYEATLEEC(Carbamidomethyl)C(Carbamidomethyl)AK(D)                        |
| 1539.60       | 1539.82     | -0.22    | 483   | 495 | 1           | (R)LC(Carbamidomethyl)VLHEKTPVSEK(V)                                        |
| 1554.60       | 1554.65     | -0.05    | 387   | 399 | 0           | (K)DDPHAC(Carbamidomethyl)YSTVFDK(L)                                        |
| 1567.56       | 1567.74     | -0.18    | 347   | 359 | 0           | (K)DAFLGSFLYEYSR(R)                                                         |
| 1577.53       | 1576.77     | 0.76     | 139   | 151 | 0           | (K)LKPDNTLC(Carbamidomethyl)DEFK(A)                                         |
| 1579.60       | 1579.73     | -0.13    | 456   | 468 | 1           | (K)VGTRC(Carbamidomethyl)C(Carbamidomethyl)TKPESER(M)                       |
| 1595.63       | 1595.93     | -0.30    | 361   | 374 | 1           | (R)HPEYAVSVLLRLAK(E)                                                        |
| 1639.77       | 1639.94     | -0.17    | 437   | 451 | 1           | (R)KVPQVSTPTLVEVSR(S)                                                       |
| 1684.50       | 1684.82     | -0.32    | 286   | 299 | 1           | (K)YIC(Carbamidomethyl)DNQDTISSK(L)                                         |
| 1724.55       | 1724.83     | -0.28    | 469   | 482 | 0           | (R)MPC(Carbamidomethyl)TEDYLSLILNR(L)                                       |
| 1748.41       | 1747.71     | 0.70     | 184   | 197 | 0           | (K)YNGVFQEC(Carbamidomethyl)C(Carbamidomethyl)QAEDK(G)                      |
| 1749.49       | 1749.66     | -0.17    | 267   | 280 | 0           | (K)EC(Carbamidomethyl)C(Carbamidomethyl)HGDLLC(Carbamidomethyl)ADDR(A)      |
| 1881.55       | 1880.92     | 0.63     | 508   | 523 | 0           | (R)RPC(Carbamidomethyl)FSALTPDETYVPK(A)                                     |
| 1889.54       | 1888.93     | 0.61     | 169   | 183 | 0           | (R)HPYFYAPELLYYANK(Y)                                                       |
| 1902.43       | 1901.87     | 0.56     | 123   | 138 | 1           | (R)NEC(Carbamidomethyl)FLSHKDDSPDLPK(L)                                     |
| 1908.60       | 1907.92     | 0.68     | 529   | 544 | 0           | (K)LFTFHADIC(Carbamidomethyl)TLPDTEK(Q)                                     |
| 1946.49       | 1946.02     | 0.48     | 89    | 105 | 1           | (K)SLHTLFGDEL(Carbamidomethyl)KVASLR(E)                                     |
| 2045.60       | 2045.03     | 0.57     | 168   | 183 | 1           | (R)RHPYFYAPELLYYANK(Y)                                                      |
| 2090.63       | 2091.08     | -0.45    | 588   | 607 | 1           | (K)EAC(Carbamidomethyl)FAVEGPKLVSTQTALA(-)                                  |
| 2247.35       | 2247.94     | -0.59    | 267   | 285 | 1           | (K)EC(Carbamidomethyl)C(Carbamidomethyl)HGDLLC(Carbamidomethyl)ADDRADLAK(Y) |
| 2492.82       | 2492.26     | 0.56     | 45    | 65  | 0           | (K)GLVLIASFQYLQQC(Carbamidomethyl)PFDEHVK(L)                                |

## Peptide fragments observed using LDI MS for BSA digest

| m/z submitted | MH+ matched | Delta Da | Start | End | Missed clvg | Sequence                                                                    |
|---------------|-------------|----------|-------|-----|-------------|-----------------------------------------------------------------------------|
| 432.18        | 432.26      | -0.08    | 456   | 459 | 0           | (K)VGTR(C)                                                                  |
| 439.18        | 439.23      | -0.05    | 434   | 436 | 0           | (R)YTR(K)                                                                   |
| 508.25        | 508.25      | 0.00     | 229   | 232 | 0           | (K)FGER(A)                                                                  |
| 545.35        | 545.34      | 0.01     | 101   | 105 | 0           | (K)VASLR(E)                                                                 |
| 658.38        | 658.32      | 0.06     | 118   | 122 | 0           | (K)QEPER(N)                                                                 |
| 689.43        | 689.37      | 0.05     | 236   | 241 | 0           | (K)AWSVAR(L)                                                                |
| 706.37        | 706.36      | 0.01     | 223   | 228 | 0           | (R)C(Carbamidomethyl)ASIQK(F)                                               |
| 712.42        | 712.37      | 0.05     | 29    | 34  | 0           | (K)SEIAHR(F)                                                                |
| 752.39        | 752.36      | 0.03     | 341   | 346 | 0           | (K)NYQEAK(D)                                                                |
| 758.42        | 758.42      | 0.00     | 198   | 204 | 0           | (K)GAC(Carbamidomethyl)LLPK(I)                                              |
| 789.54        | 789.47      | 0.07     | 257   | 263 | 0           | (K)LVTDLTK(V)                                                               |
| 818.47        | 818.43      | 0.04     | 562   | 568 | 0           | (K)ATEEQLK(T)                                                               |
| 898.45        | 898.48      | -0.03    | 483   | 489 | 0           | (R)LC(Carbamidomethyl)VLHEK(T)                                              |
| 922.44        | 922.49      | -0.04    | 249   | 256 | 0           | (K)AEFVEVTK(L)                                                              |
| 927.46        | 927.49      | -0.03    | 161   | 167 | 0           | (K)YLYEIAR(R)                                                               |
| 1001.79       | 1001.59     | 0.20     | 233   | 241 | 1           | (R)ALKAWSVAR(L)                                                             |
| 1014.44       | 1014.62     | -0.18    | 549   | 557 | 0           | (K)QALVELLK(H)                                                              |
| 1138.35       | 1138.50     | -0.15    | 499   | 507 | 0           | (K)C(Carbamidomethyl)C(Carbamidomethyl)TESLVNR(R)                           |
| 1143.38       | 1142.71     | 0.66     | 548   | 557 | 1           | (K)KQALVELLK(H)                                                             |
| 1163.31       | 1163.63     | -0.33    | 66    | 75  | 0           | (K)LVNELTEFAK(T)                                                            |
| 1166.41       | 1166.49     | -0.08    | 460   | 468 | 0           | (R)C(Carbamidomethyl)C(Carbamidomethyl)TKPESER(M)                           |
| 1193.41       | 1193.60     | -0.19    | 25    | 34  | 1           | (R)DTHKSEIAHR(F)                                                            |
| 1195.36       | 1195.59     | -0.23    | 223   | 232 | 1           | (R)C(Carbamidomethyl)ASIQKFGER(A)                                           |
| 1249.36       | 1249.62     | -0.26    | 35    | 44  | 1           | (R)FKDLGEEHFK(G)                                                            |
| 1283.40       | 1283.71     | -0.31    | 361   | 371 | 0           | (R)HPEYAVSVLLR(L)                                                           |
| 1419.36       | 1419.69     | -0.33    | 89    | 100 | 0           | (K)SLHTLFGDEL(Carbamidomethyl)K(V)                                          |
| 1439.41       | 1439.81     | -0.40    | 360   | 371 | 1           | (R)RHPEYAVSVLLR(L)                                                          |
| 1463.34       | 1463.59     | -0.25    | 76    | 88  | 0           | (K)TC(Carbamidomethyl)VADESHAGC(Carbamidomethyl)EK(S)                       |
| 1466.33       | 1466.71     | -0.38    | 496   | 507 | 1           | (K)VTKC(Carbamidomethyl)C(Carbamidomethyl)TESLVNR(R)                        |
| 1479.38       | 1479.80     | -0.41    | 421   | 433 | 0           | (K)LGEYGFQNALIVR(Y)                                                         |
| 1502.24       | 1502.61     | -0.38    | 375   | 386 | 0           | (K)EYEATLEEC(Carbamidomethyl)C(Carbamidomethyl)AK(D)                        |
| 1533.31       | 1532.78     | 0.53     | 298   | 309 | 1           | (K)LKEC(Carbamidomethyl)C(Carbamidomethyl)DKPLLEK(S)                        |
| 1554.40       | 1554.65     | -0.26    | 387   | 399 | 0           | (K)DDPHAC(Carbamidomethyl)YSTVFDK(L)                                        |
| 1567.25       | 1567.74     | -0.50    | 347   | 359 | 0           | (K)DAFLGSFLYEYSR(R)                                                         |
| 1576.26       | 1576.77     | -0.51    | 139   | 151 | 0           | (K)LKPDNTLC(Carbamidomethyl)DEFK(A)                                         |
| 1639.43       | 1639.94     | -0.51    | 437   | 451 | 1           | (R)KVPQVSTPTLVEVSR(S)                                                       |
| 1725.23       | 1724.83     | 0.39     | 469   | 482 | 0           | (R)MPC(Carbamidomethyl)TEDYLSLILNR(L)                                       |
| 1750.23       | 1749.66     | 0.56     | 267   | 280 | 0           | (K)EC(Carbamidomethyl)C(Carbamidomethyl)HGDLLC(Carbamidomethyl)ADDR(A)      |
| 1881.25       | 1880.92     | 0.33     | 508   | 523 | 0           | (R)RPC(Carbamidomethyl)FSALTPDETYVPK(A)                                     |
| 1908.16       | 1907.92     | 0.24     | 529   | 544 | 0           | (K)LFTFHADIC(Carbamidomethyl)TLPDTEK(Q)                                     |
| 2045.30       | 2045.03     | 0.28     | 168   | 183 | 1           | (R)RHPYFYAPELLYYANK(Y)                                                      |
| 2248.18       | 2247.94     | 0.24     | 267   | 285 | 1           | (K)EC(Carbamidomethyl)C(Carbamidomethyl)HGDLLC(Carbamidomethyl)ADDRADLAK(Y) |

## Peptide fragments observed using MALDI MS for Catalase digest

| m/z submitted | MH+ matched | Delta Da | Start | End | Missed clvg | Sequence                                       |
|---------------|-------------|----------|-------|-----|-------------|------------------------------------------------|
| 614.44        | 614.40      | 0.04     | 316   | 320 | 0           | (K)LVLNR(N)                                    |
| 1119.31       | 1119.56     | -0.25    | 355   | 363 | 0           | (R)LFAYPDTHR(H)                                |
| 1342.66       | 1342.62     | 0.04     | 6     | 16  | 1           | (R)DPASDQMKHWK(E)                              |
| 1407.73       | 1407.63     | 0.10     | 481   | 492 | 0           | (K)NFSDVHPEYGSR(I)                             |
| 1502.89       | 1502.80     | 0.09     | 157   | 169 | 0           | (R)DALLFPSFIHSQK(R)                            |
| 1616.94       | 1616.82     | 0.12     | 238   | 252 | 1           | (K)TDQGIKNSVEDAAR(L)                           |
| 1740.85       | 1740.83     | 0.02     | 78    | 93  | 0           | (K)GAGAFGYFEVTHDITR(Y)                         |
| 1804.68       | 1803.92     | 0.76     | 366   | 380 | 0           | (R)LGPNYLQIPVNC(Carbamidomethyl)PYR(A)         |
| 1852.41       | 1851.88     | 0.53     | 113   | 130 | 1           | (R)FSTVAGESGSADTVRDPR(G)                       |
| 1912.74       | 1912.94     | -0.20    | 222   | 237 | 1           | (K)LVNANGEAVYC(Carbamidomethyl)KFHYK(T)        |
| 2096.39       | 2097.08     | -0.70    | 364   | 380 | 1           | (R)HRLGPNYLQIPVNC(Carbamidomethyl)PYR(A)       |
| 2132.55       | 2132.04     | 0.51     | 432   | 449 | 1           | (R)FNSANDDNVTQVRTFYLK(V)                       |
| 2189.44       | 2189.10     | 0.34     | 481   | 499 | 1           | (K)NFSDVHPEYGSRIQALLDK(Y)                      |
| 2474.22       | 2474.21     | 0.01     | 48    | 68  | 1           | (R)GPLLVQDVVFTDEMAHFDRER(I)                    |
| 2518.15       | 2518.20     | -0.05    | 136   | 156 | 0           | (K)FYTEDGNWDLVGNNTPIFFIR(D)                    |
| 2596.79       | 2597.20     | -0.41    | 211   | 233 | 1           | (R)HMNGYGSHTFKLVNANGEAVYC(Carbamidomethyl)K(F) |
| 2761.99       | 2762.48     | -0.49    | 20    | 47  | 1           | (R)AAQKPDVLTGGGNPVGDKLNSLTVGPR(G)              |
| 3125.95       | 3126.60     | -0.66    | 39    | 66  | 1           | (K)LNSLTVGPRGPLLVQDVVFTDEMAHFDR(E)             |
| 3209.14       | 3209.51     | -0.38    | 178   | 203 | 0           | (K)DPDMVWDFWLSLRPESLHQVSFLFSDR(G)              |

## Peptide fragments observed using LDI MS for Catalase digest

| m/z submitted | MH+ matched | Delta Da | Start | End | Missed clvg | Sequence                               |
|---------------|-------------|----------|-------|-----|-------------|----------------------------------------|
| 614.15        | 614.40      | -0.25    | 316   | 320 | 0           | (K)LVLNR(N)                            |
| 656.22        | 656.41      | -0.19    | 107   | 112 | 0           | (R)TPIAVR(F)                           |
| 671.23        | 671.38      | -0.14    | 445   | 449 | 0           | (R)TFYLK(V)                            |
| 750.34        | 750.39      | -0.05    | 383   | 388 | 0           | (R)VANYQR(D)                           |
| 751.36        | 751.38      | -0.02    | 204   | 210 | 0           | (R)GIPDGHR(H)                          |
| 812.46        | 812.51      | -0.05    | 106   | 112 | 1           | (K)RTPIAVR(F)                          |
| 829.38        | 829.46      | -0.08    | 99    | 105 | 0           | (K)VFEHIGK(R)                          |
| 887.54        | 887.46      | 0.08     | 450   | 456 | 0           | (K)VLNEEQR(K)                          |
| 889.50        | 889.49      | 0.01     | 128   | 135 | 1           | (R)DPRGFAVK(F)                         |
| 956.67        | 956.55      | 0.12     | 39    | 47  | 0           | (K)LNSLTVGPR(G)                        |
| 962.60        | 962.53      | 0.07     | 469   | 476 | 0           | (K)DAQLFIQK(K)                         |
| 974.60        | 974.49      | 0.11     | 244   | 252 | 0           | (K)NLSVEDAAR(L)                        |
| 1014.91       | 1015.55     | -0.64    | 450   | 457 | 1           | (K)VLNEEQRK(R)                         |
| 1046.67       | 1046.50     | 0.17     | 423   | 431 | 0           | (R)THFSGDVQR(F)                        |
| 1119.72       | 1119.56     | 0.16     | 355   | 363 | 0           | (R)LFAYPDTHR(H)                        |
| 1154.78       | 1154.60     | 0.18     | 459   | 468 | 0           | (R)LC(Carbamidomethyl)ENIAGHLK(D)      |
| 1285.78       | 1285.62     | 0.17     | 253   | 263 | 0           | (R)LAHEDPDYGLR(D)                      |
| 1342.75       | 1342.62     | 0.13     | 6     | 16  | 1           | (R)DPASDQMKHWK(E)                      |
| 1407.78       | 1407.63     | 0.15     | 481   | 492 | 0           | (K)NFSDVHPEYGSR(I)                     |
| 1479.76       | 1479.68     | 0.08     | 432   | 444 | 0           | (R)FNSANDDNVTQVR(T)                    |
| 1483.80       | 1483.70     | 0.10     | 113   | 127 | 0           | (R)FSTVAGESGSADTVR(D)                  |
| 1502.79       | 1502.80     | -0.01    | 157   | 169 | 0           | (R)DALLFPSFIHSQK(R)                    |
| 1740.75       | 1740.83     | -0.08    | 78    | 93  | 0           | (K)GAGAFGYFEVTHDITR(Y)                 |
| 1804.65       | 1803.92     | 0.83     | 366   | 380 | 0           | (R)LGPNYLQIPVNC(Carbamidomethyl)PYR(A) |
| 1825.68       | 1824.95     | 0.74     | 20    | 38  | 0           | (R)AAQKPDVLTGGGNPVGDK(L)               |
| 1851.71       | 1851.88     | -0.17    | 113   | 130 | 1           | (R)FSTVAGESGSADTVRDPR(G)               |
| 2518.32       | 2518.20     | 0.12     | 136   | 156 | 0           | (K)FYTEDGNWDLVGNNTPIFFIR(D)            |

## Peptide fragments observed using MALDI MS for Lactoperoxidase digest

| m/z submitted | MH+     | match | Delta Da | Start | End | Missed clvg | Sequence                                                                          |
|---------------|---------|-------|----------|-------|-----|-------------|-----------------------------------------------------------------------------------|
| 554.63        | 555.26  | -0.63 | 389      | 392   |     | 0           | (R)EHNR(L)                                                                        |
| 568.63        | 568.33  | 0.30  | 76       | 80    |     | 1           | (K)HAKGR(T)                                                                       |
| 1168.34       | 1168.69 | -0.35 | 624      | 634   |     | 0           | (R)VGPLLAC(Carbamidomethyl)LLGR(Q)                                                |
| 1181.24       | 1181.58 | -0.34 | 363      | 372   |     | 0           | (R)VPC(Carbamidomethyl)FLAGDFR(A)                                                 |
| 1391.38       | 1391.84 | -0.46 | 416      | 427   |     | 0           | (K)ILGAFIQITFR(D)                                                                 |
| 1467.26       | 1467.81 | -0.55 | 545      | 557   |     | 0           | (K)IHGFDLAAINLQR(C)                                                               |
| 1520.35       | 1520.75 | -0.40 | 350      | 362   |     | 0           | (K)KPSPC(Carbamidomethyl)EFINTTAR(V)                                              |
| 1540.07       | 1539.73 | 0.35  | 645      | 656   |     | 0           | (R)FWWENPGVFTEK(Q)                                                                |
| 1664.03       | 1663.83 | 0.21  | 280      | 294   |     | 0           | (R)AGFVC(Carbamidomethyl)PTPPYQSLAR(E)                                            |
| 1720.07       | 1719.85 | 0.22  | 199      | 213   |     | 0           | (K)IVGYLDEEGVLDQNR(S)                                                             |
| 1750.14       | 1750.02 | 0.11  | 373      | 388   |     | 0           | (R)ASEQILLATAHTLLLR(E)                                                            |
| 1806.09       | 1805.86 | 0.23  | 441      | 455   |     | 0           | (K)WIPPYQGYNNSVDPRI(I)                                                            |
| 2126.65       | 2127.02 | -0.37 | 603      | 621   |     | 0           | (K)TPDNIDIWIGGNAEPMVER(G)                                                         |
| 2248.57       | 2249.10 | -0.53 | 163      | 181   |     | 0           | (R)WLP AEYEDGLALPFGWTQR(K)                                                        |
| 2376.65       | 2377.20 | -0.55 | 163      | 182   |     | 1           | (R)WLP AEYEDGLALPFGWTQRK(T)                                                       |
| 2653.72       | 2654.33 | -0.61 | 295      | 319   |     | 0           | (R)EQINAVTSFLDASLVYGSEPSLASR(L)                                                   |
| 2674.53       | 2674.24 | 0.30  | 679      | 701   |     | 0           | (K)VPLHAFQANNYPHDFVDC(Carbamidomethyl)STVDK(L)                                    |
| 2992.06       | 2991.28 | 0.78  | 244      | 267   |     | 1           | (K)TQC(Carbamidomethyl)EEYC(Carbamidomethyl)IQGDNC(Carbamidomethyl)FPIMFPKNDPK(L) |
| 3072.76       | 3073.48 | -0.72 | 478      | 502   |     | 0           | (R)LDENYQPWGPEALPLHLLFFNTWR(I)                                                    |
| 3425.89       | 3425.76 | 0.13  | 100      | 131   |     | 1           | (R)RDTTLTNTVDP SLDLTALSWEVGC(Carbamidomethyl)GAPVPLVK(C)                          |

## Peptide fragments observed using LDI MS for Lactoperoxidase digest

| m/z submitted | MH+     | matched | Delta Da | Start | End | Missed clvg | Sequence                                       |
|---------------|---------|---------|----------|-------|-----|-------------|------------------------------------------------|
| 778.92        | 779.40  | -0.49   | 409      | 414   |     | 0           | (K)LYQEAR(K)                                   |
| 818.99        | 819.45  | -0.45   | 635      | 640   |     | 0           | (R)QFQQIR(D)                                   |
| 856.99        | 857.38  | -0.39   | 274      | 279   |     | 0           | (K)C(Carbamidomethyl)MPFFR(A)                  |
| 869.99        | 870.48  | -0.50   | 538      | 544   |     | 0           | (K)LFQPTHK(I)                                  |
| 941.06        | 941.51  | -0.45   | 506      | 514   |     | 0           | (K)DGGIDPLVR(G)                                |
| 1012.14       | 1012.56 | -0.43   | 149      | 158   |     | 1           | (R)RSPALGAANR(A)                               |
| 1029.17       | 1029.60 | -0.43   | 185      | 193   |     | 1           | (R)NGFRVPLAR(E)                                |
| 1044.12       | 1044.55 | -0.43   | 702      | 710   |     | 0           | (K)LDLSPWASR(E)                                |
| 1168.19       | 1168.69 | -0.50   | 624      | 634   |     | 0           | (R)VGPLLAC(Carbamidomethyl)LLGR(Q)             |
| 1181.09       | 1181.58 | -0.49   | 363      | 372   |     | 0           | (R)VPC(Carbamidomethyl)FLAGDFR(A)              |
| 1190.15       | 1189.58 | 0.57    | 87       | 96    |     | 0           | (R)NGQVWEESLK(R)                               |
| 1201.15       | 1201.64 | -0.49   | 456      | 465   |     | 0           | (R)ISNVFTFAFR(F)                               |
| 1206.14       | 1206.56 | -0.42   | 140      | 149   |     | 1           | (R)TITGDC(Carbamidomethyl)NNRR(S)              |
| 1271.03       | 1271.60 | -0.58   | 270      | 279   |     | 1           | (K)TQGKC(Carbamidomethyl)MPFFR(A)              |
| 1295.22       | 1295.77 | -0.55   | 503      | 514   |     | 1           | (R)IIKDGGIDPLVR(G)                             |
| 1320.03       | 1319.56 | 0.48    | 560      | 570   |     | 0           | (R)DHGMPGYNSWR(G)                              |
| 1336.07       | 1335.71 | 0.36    | 571      | 582   |     | 1           | (R)GFC(Carbamidomethyl)GLSQPKTLK(G)            |
| 1346.06       | 1345.69 | 0.38    | 87       | 97    |     | 1           | (R)NGQVWEESLKR(L)                              |
| 1391.13       | 1391.84 | -0.71   | 416      | 427   |     | 0           | (K)ILGAFIQITFR(D)                              |
| 1468.10       | 1467.81 | 0.30    | 545      | 557   |     | 0           | (K)IHGFDLAAINLQR(C)                            |
| 1493.05       | 1492.77 | 0.28    | 428      | 440   |     | 0           | (R)DYLPIVLGSEMQR(W)                            |
| 1539.95       | 1539.73 | 0.22    | 645      | 656   |     | 0           | (R)FWWENPGVFTEK(Q)                             |
| 1635.85       | 1635.69 | 0.16    | 558      | 570   |     | 1           | (R)C(Carbamidomethyl)RDHGMPGYNSWR(G)           |
| 1663.92       | 1663.83 | 0.09    | 280      | 294   |     | 0           | (R)AGFVC(Carbamidomethyl)PTPPYQSLAR(E)         |
| 1719.88       | 1719.85 | 0.02    | 199      | 213   |     | 0           | (K)IVGYLDEEGVLDQNR(S)                          |
| 1750.02       | 1750.02 | -0.01   | 373      | 388   |     | 0           | (R)ASEQILLATAHTLLLR(E)                         |
| 1805.98       | 1805.86 | 0.12    | 441      | 455   |     | 0           | (K)WIPPYQGYNNSVDPRI(I)                         |
| 2126.53       | 2127.02 | -0.49   | 603      | 621   |     | 0           | (K)TPDNIDIWIGGNAEPMVER(G)                      |
| 2248.36       | 2249.10 | -0.74   | 163      | 181   |     | 0           | (R)WLP AEYEDGLALPFGWTQR(K)                     |
| 2653.82       | 2654.33 | -0.52   | 295      | 319   |     | 0           | (R)EQINAVTSFLDASLVYGSEPSLASR(L)                |
| 2675.02       | 2674.24 | 0.78    | 679      | 701   |     | 0           | (K)VPLHAFQANNYPHDFVDC(Carbamidomethyl)STVDK(L) |
